# Supplementary material for: A facile morphology tunable strategy of Zn-MOF derived hierarchically carbon materials with enhanced supercapacitive performance through the solvent effect
Source: Royal Society of Chemistry journal article supplement (doi:10.1039/d2dt02624d), 2022-01-01
Supplement: d2dt02624d1.pdf [file d2dt02624d1.pdf]

## Supporting Information

### **A facile morphology tunable strategy of Zn-MOF derived hierarchically carbon materials with enhanced supercapacitive performance through solvent effect**

Rui Miao<sup>†</sup>, Chaohua Sun<sup>†</sup>, Jipeng Li<sup>†</sup>, Yanzhi Sun<sup>†,\*</sup>, Yongmei Chen<sup>†</sup>, Junqing Pan<sup>‡</sup>,  
Yang Tang<sup>†</sup>, Pingyu Wan<sup>†</sup>

<sup>†</sup>National Fundamental Research Laboratory of New Hazardous Chemicals Assessment and Accident Analysis, Institute of Applied Electrochemistry, Beijing University of Chemical Technology, Beijing 100029, China

<sup>‡</sup>State Key Laboratory of Chemical Resource Engineering, Beijing University of Chemical Technology, Beijing 100029, China

\*E-mail: [sunyz@buct.edu.cn](mailto:sunyz@buct.edu.cn) (Y. Sun);

Tel./Fax: 8610-64435452

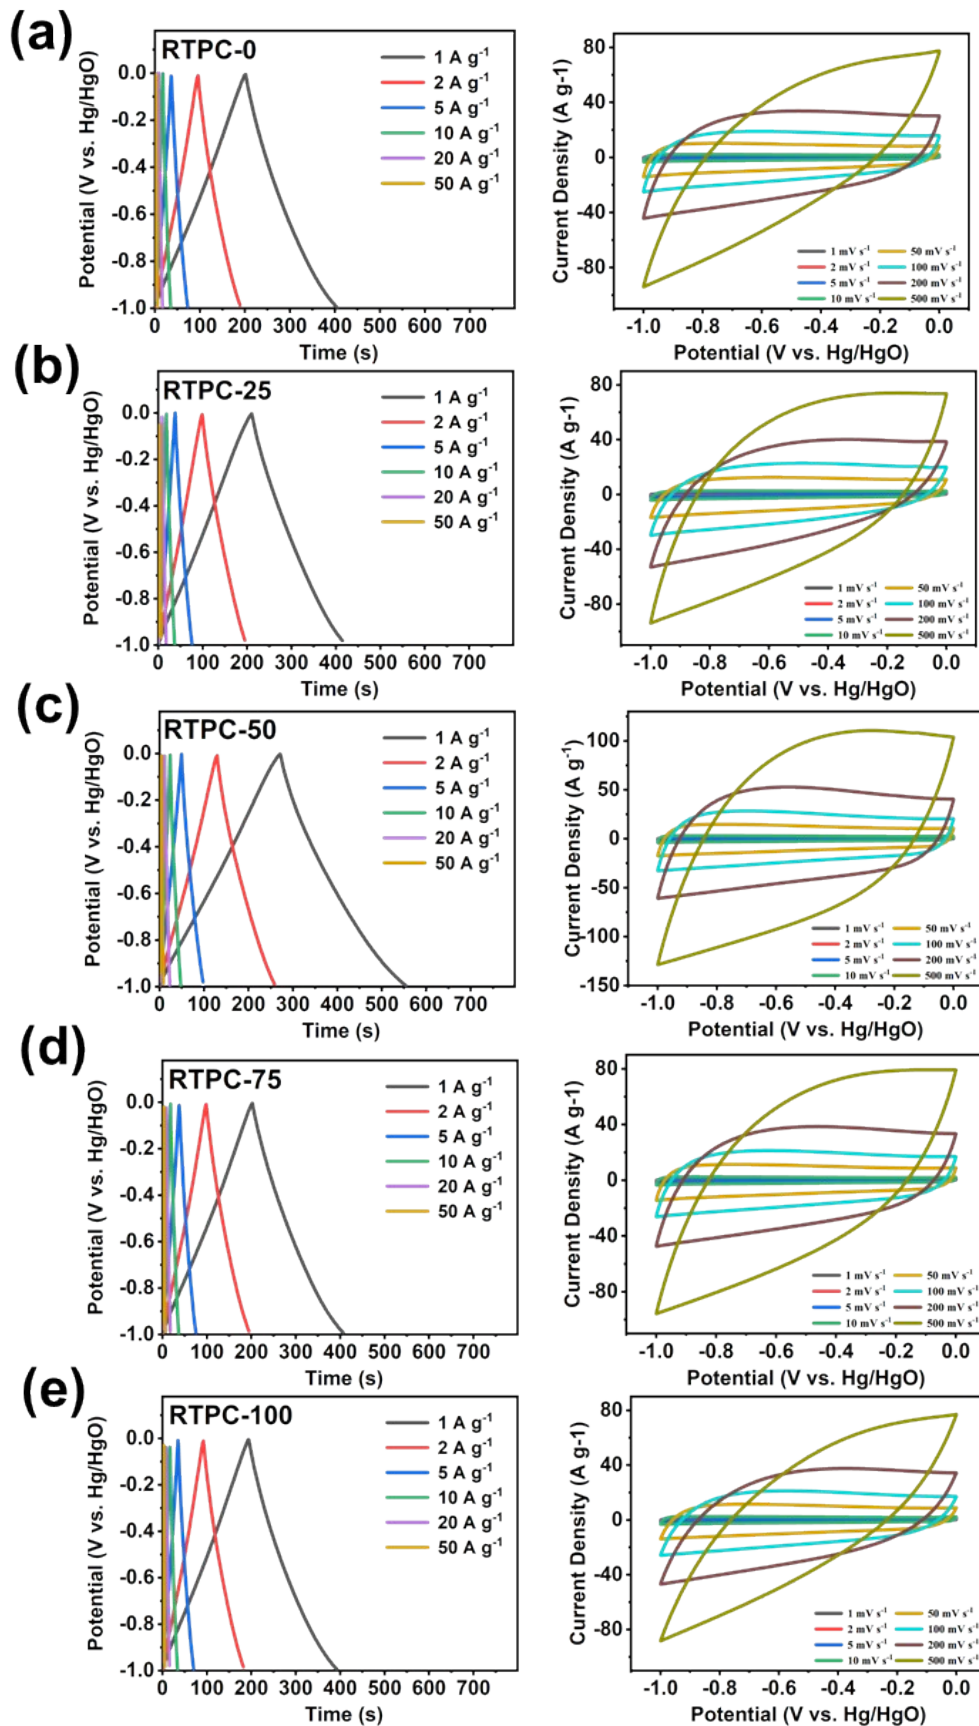

**Fig. S1** The GCD and CV curves of RTPC prepared in different solvents at different current densities.

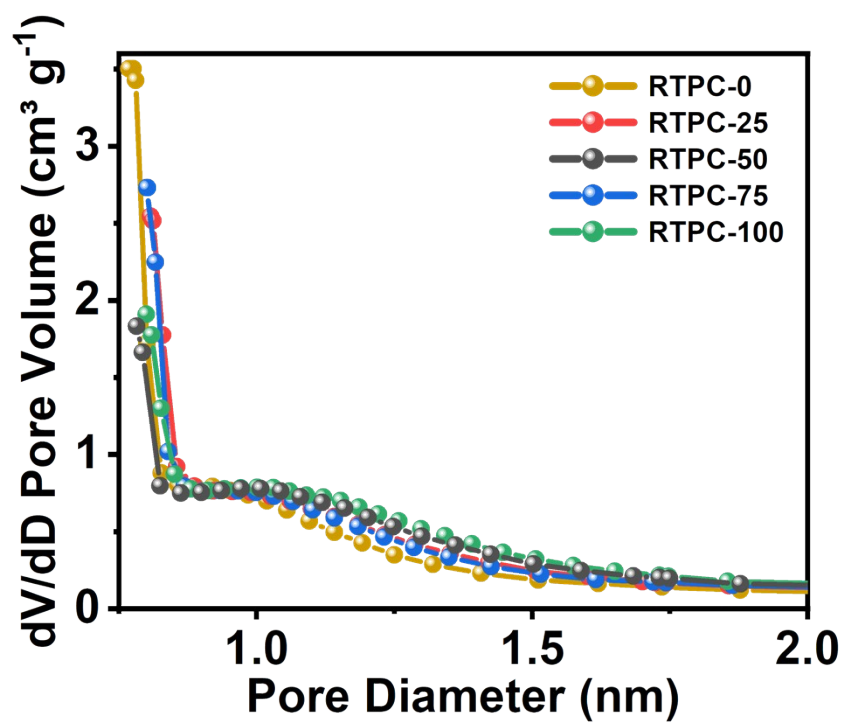

Fig. S2 HK pore size distribution of the five samples

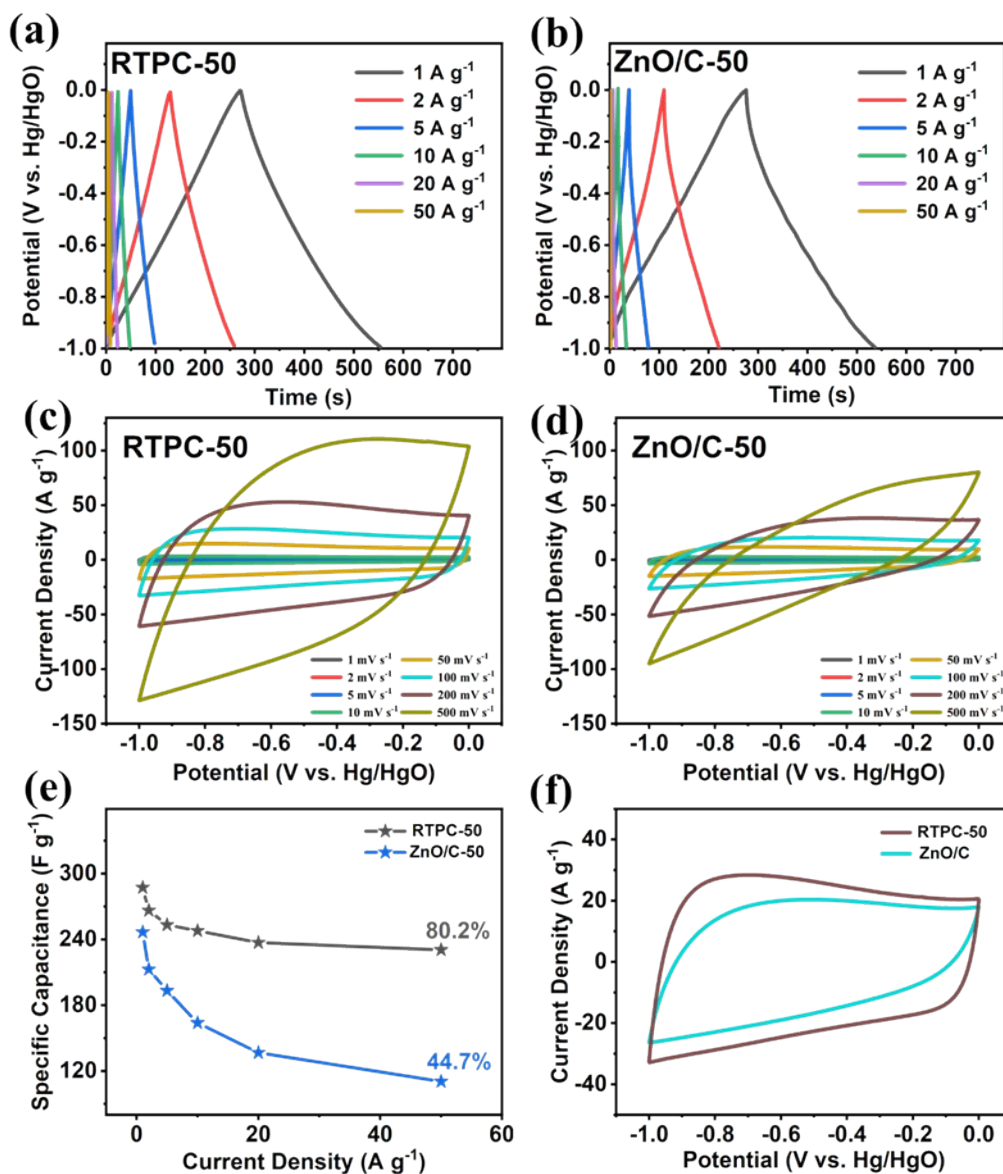

**Fig. S3** (a, b): GCD curves at different current density of RTPC-50 and ZnO/C-50; (c, d): CV curves at different scanning rates of RTPC-50 and ZnO/C-50; (e) The comparison of specific capacitance at different current density of RTPC-50 and ZnO/C-50; (f) The comparison of CV curve at 100 mV s<sup>-1</sup> of RTPC-50 and ZnO/C-50.

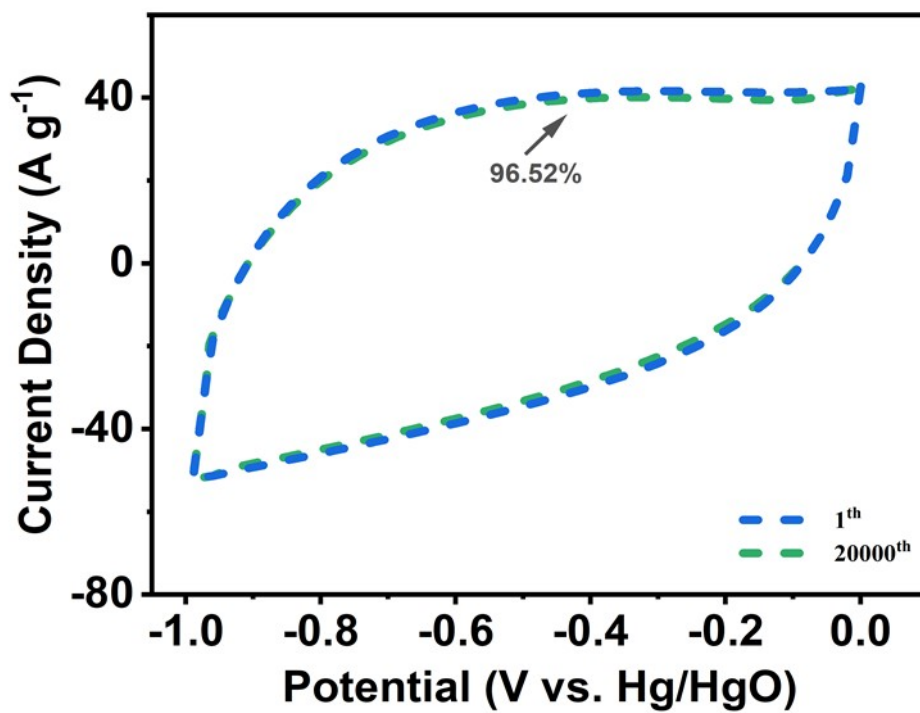

**Fig. S4** Comparison diagram of CV curves for 1<sup>st</sup> and 20000<sup>th</sup> cycle at the scanning speed of 200 mV s<sup>-1</sup>.

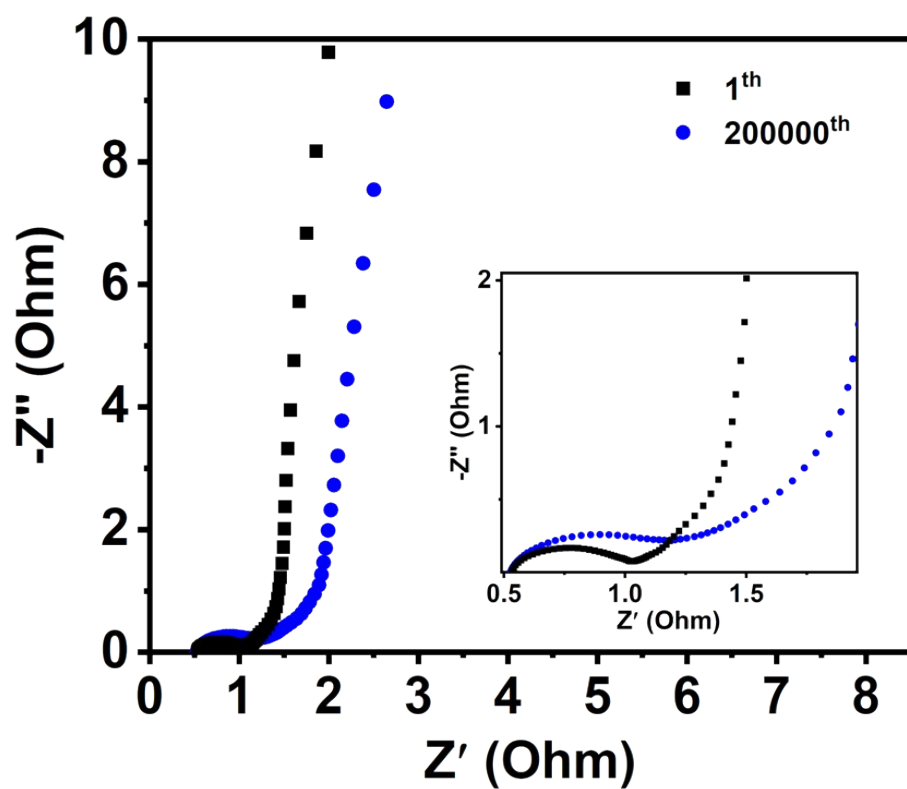

Fig. S5 Nyquist plots after 1<sup>st</sup> and 200000<sup>th</sup> GCD cycles (Inset is the magnified image in high-frequency regions)

**Table S1** The detailed information of characterization instruments

| Technique                               | Model                | Manufacturer                            |
|-----------------------------------------|----------------------|-----------------------------------------|
| Scanning Electron<br>Microscope (SEM)   | SUPRA 55<br>SAPPHIRE | Carl Zeiss AG                           |
| Energy Dispersive<br>Spectroscopy (EDS) | SUPRA 55<br>SAPPHIRE | Carl Zeiss AG                           |
| Thermal Gravimetric<br>Analysis (TGA)   | STA 449 F3           | NETZSCH-Gerätebau GmbH                  |
| X-ray Diffraction<br>(XRD)              | XRD-6000             | Shimadzu                                |
| X-ray Photoelectron<br>Spectra (XPS)    | AXIS ULTRA DLD       | Shimadzu                                |
| Brunauer-Emmett-<br>Teller (BET)        | ASAP 2460            | Micromeritics Instrument<br>Corporation |

**Table S2** The specific surface area and pore structure of five samples

|          | BET Surface Area (cm <sup>2</sup> g <sup>-1</sup> ) | average pore diameter (nm) | t-Plot Micropore Area (cm <sup>2</sup> g <sup>-1</sup> ) | t-Plot micropore volume (cm <sup>3</sup> g <sup>-1</sup> ) |
|----------|-----------------------------------------------------|----------------------------|----------------------------------------------------------|------------------------------------------------------------|
| RTPC-0   | 1597.4                                              | 1.8                        | 1009.0                                                   | 0.40                                                       |
| RTPC-25  | 1760.9                                              | 2.6                        | 740.9                                                    | 0.31                                                       |
| RTPC-50  | 1930.4                                              | 2.9                        | 638/1                                                    | 0.27                                                       |
| RTPC-75  | 1764.7                                              | 2.4                        | 893.8                                                    | 0.36                                                       |
| RTPC-100 | 2061.7                                              | 3.3                        | 454.5                                                    | 0.19                                                       |



Table S3 C 1s, Zn 2p and O 1s parameters of Zn-BTC, ZnO/C and RTPC-50

|              | Zn-BTC | ZnO/C | RTPC-50 |
|--------------|--------|-------|---------|
| C 1s (at.%)  | 66.76  | 90.13 | 92.57   |
| O 1s (at.%)  | 19.76  | 9.72  | 7.43    |
| Zn 2p (at.%) | 13.48  | 0.15  | 0       |
